# Supplementary material
Source: publisher figshare collection journal article supplement (https://gsajournals.figshare.com/ndownloader/files/17768246)
Supplement: Supplementary file 1 [file 17768246]

**Table S4. qRT-PCR primers.**

| T1 F | AGTGACAGCGACCAGGAAGA |
| --- | --- |
| T1 R | TGGCTTCTCTCTCTAGACCCGA |
| T4 F | GTGATCCACCCGGAGAGAAC |
| T4/T6 R | CGCCAACACCTAACTCTGGA |
| T5 F | GCGTACCCCAGGCAGAAAT |
| T5 R | ATGTCTTCGGCTGGAATGCT |
| T6 F | TGCCTTTGTGGCTGAGTCTT |
| Pgk1 F | CTGACTTTGGACAAGCTGGACG |
| Pgk1 R | GCAGCCTTGATCCTTTGGTTG |

Sequences of qRT-PCR primers used to detect each *Auts2* isoform, and control Pgk1.
